# Supplementary material
Source: PubMed Central journal article supplement (PMC2741412)

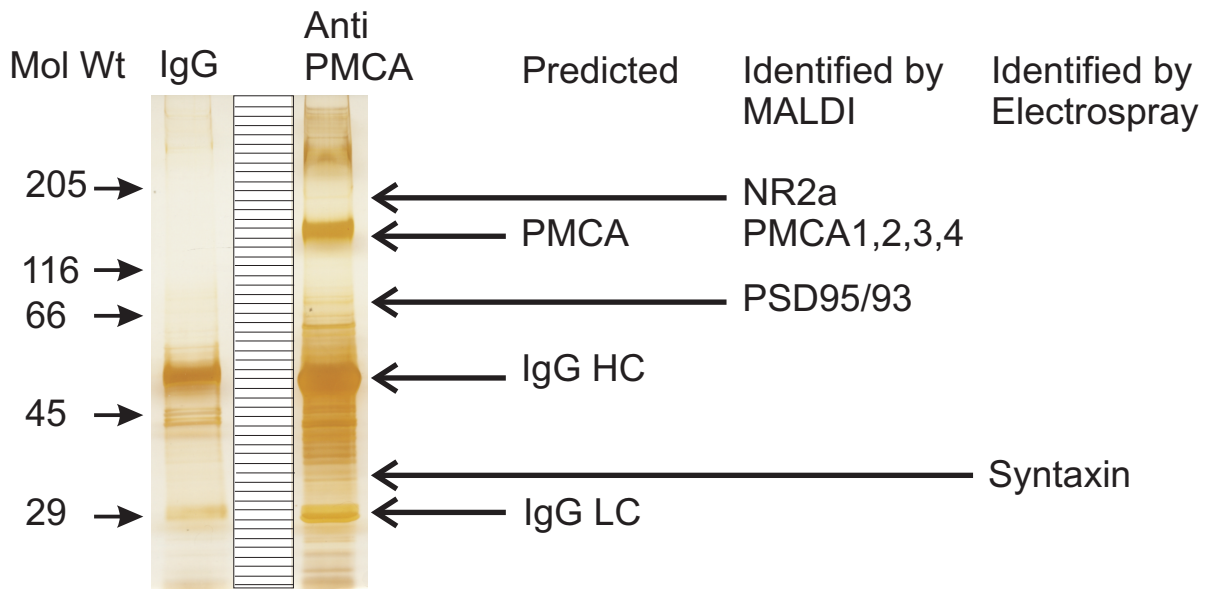

Supplement: NIHMS130578-supplement-02.pdf [file NIHMS130578-supplement-02.pdf]
